# Supplementary material for: Riociguat for the Treatment of Raynaud’s Phenomenon: A Single-Dose, Double-Blind, Randomized, Placebo-Controlled Cross-Over Pilot Study (DIGIT)
Source: Springer Nature journal article supplement (doi:10.1007/s40261-018-0698-1), 2018-09-20
Supplement: MOESM1 [file 24113298]

## *Clinical Drug Investigation*

# **Riociguat for the treatment of Raynaud's phenomenon: A single-dose, double-blind, randomized, placebo-controlled cross-over pilot study (DIGIT)**

Michael Huntgeburth<sup>1</sup> · Johannes Kießling<sup>1</sup> · Gerrit Weimann<sup>2</sup> · Verena Wilberg<sup>3</sup> · Soundos Saleh<sup>2</sup> · Nicolas Hunzelmann<sup>4\*</sup> · Stephan Rosenkranz<sup>1,5\*</sup>

<sup>1</sup> Clinic III for Internal Medicine, Department of Cardiology, Heart Center, University Hospital of Cologne, Germany

<sup>2</sup> Bayer AG, Berlin, Germany

<sup>3</sup> ClinStat GmbH, Cologne, Germany

<sup>4</sup> Department of Dermatology, University of Cologne, Germany

<sup>5</sup> Cologne Cardiovascular Research Center (CCRC), Heart Center, Cologne, Germany

## **Supplementary material**

**Supplementary Table 1** Vital signs following riociguat administration

| Time from study drug administration, h | SBP/DBP (mmHg)          |                  | Heart rate (bpm)        |                  |
|----------------------------------------|-------------------------|------------------|-------------------------|------------------|
|                                        | Riociguat 2 mg (n = 20) | Placebo (n = 20) | Riociguat 2 mg (n = 20) | Placebo (n = 20) |
| -0.5 (baseline)                        | 126/79                  | 123/78           | 72                      | 72               |
| 1                                      | 121/77                  | 124/78           | 73                      | 73               |
| 2                                      | 120/76                  | 125/78           | 73                      | 74               |
| 3                                      | 120/76                  | 124/77           | 73                      | 74               |
| 4                                      | 121/75                  | 126/78           | 74                      | 74               |

Data are mean values

*bpm* beats per minute, *DBP* diastolic blood pressure, *SBP* systolic blood pressure

**Supplementary Fig. 1** DIGIT study design

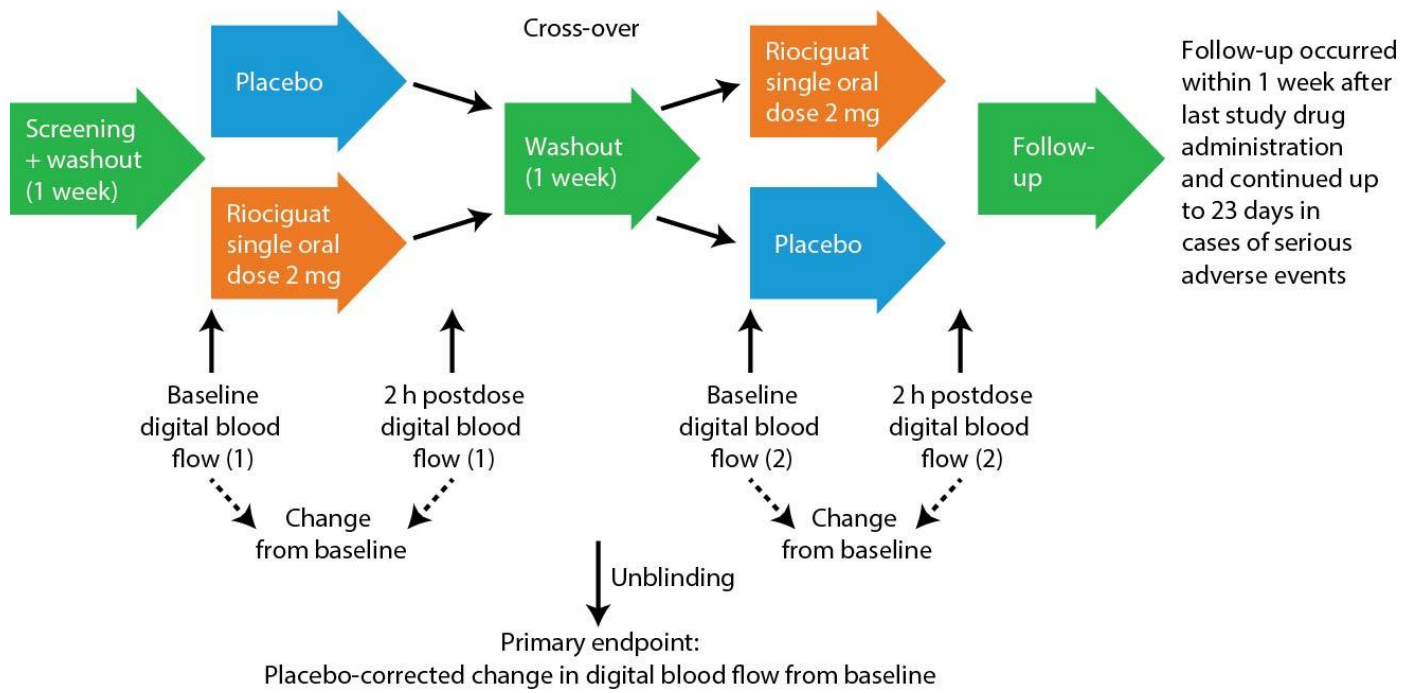

**Supplementary Fig. 2** Patient disposition in DIGIT

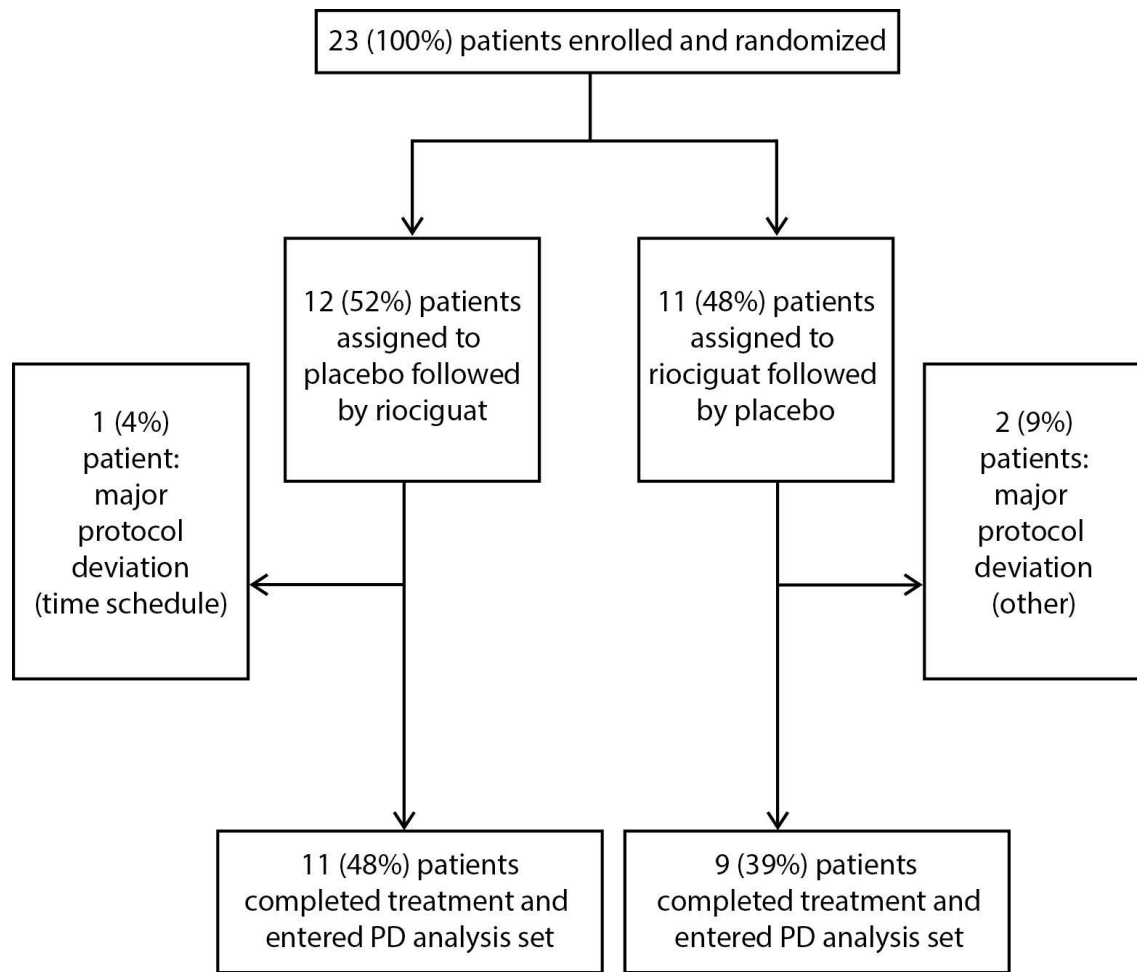

*PD* pharmacodynamic
